# Supplementary material
Source: Elsevier journal article supplement (https://comptes-rendus.academie-sciences.fr/biologies/article/10.1016/j.crvi.2014.12.003/file/attach/mmc2.pdf)

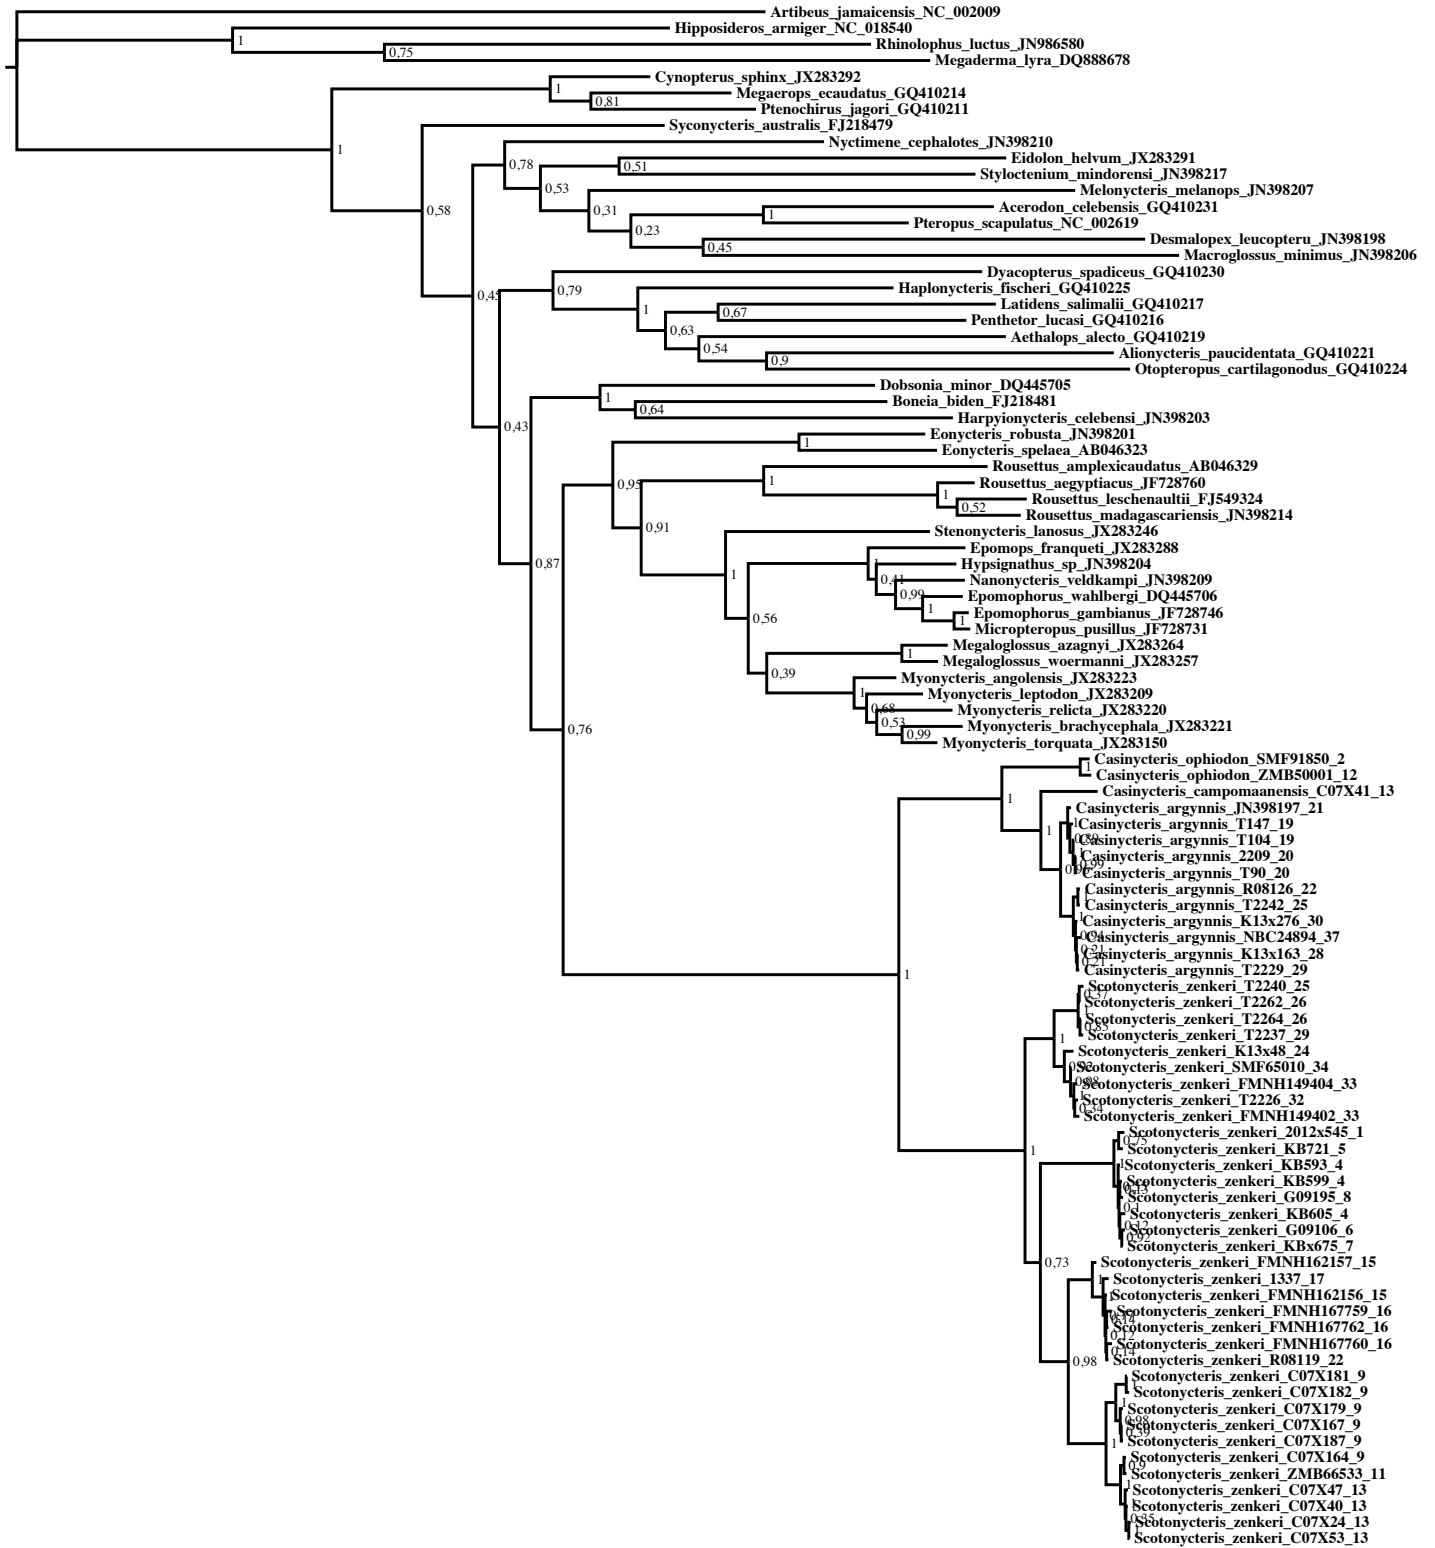

Supplement: mmc2 [file mmc2.pdf]
